# Supplementary material for: The urine dipstick test useful to rule out infections. A meta-analysis of the accuracy
Source: Springer Nature journal article supplement (doi:10.1186/1471-2490-4-4), 2004-06-02
Supplement: Additional file 2 [file 1471-2490-4-4-s2.doc]

Additional file 2. Studies (n =72)* included in the meta-analysis of the urine dipstick for diagnosing bacteriuria or urinary tract infections by measuring nitrites and/or leukocyte esterase.

| **Year First Author % Diseased Mean age % Female Collection Cut-off culture Setting**  **(N total sample) (age range) of urine cfu/ml** |
| --- |
| 1990 Berger 27 ( 500) MS 105 in- and outpatients  Ditchburn 38 ( 266) MS 105 family physician  Goldsmith 7 (1010) (<18yrs) 57 MS, C 105, 104 -  Harlass 5 ( 510) 100 MS 105 (single) outpatient dep.  Hiscoke 20 ( 970) MS 105 (2) family ph./outpatient  Iitaka 45 ( 253) 48 MS 105 community  Levy 13 ( 976) 48 mixed 105 hospital  Lorentzon 7 ( 865) 100 MS 105 outpatient dep.  McGlone 10 (1080) 71 105 emergency dep.  Pallares 9 ( 74) 26 100 MS 105 outpatient dep.  Tuel 28 ( 169) 32 21 C 105  hospital  1991 Evans 36 ( 50) 82 64 MS 105 hospital  Fulcher 20 ( 538) 65 MS 104 (single) hospital  Lejeune 15 ( 243) (< 18mths) 105 (2) hospital  Shaw 9 ( 491) 6 63 MS, C, B 105 , 103 (C)(2) outpatient dep.  Weinberg 4 (1019) (<18yrs) 105 , 104 outpatient dep.  1992 Blum 56 ( 77) (>18yrs) 100 MS 104 outpatient dep.  Cooper 54 ( 244) 45 100 105 family physician  Graninger 13 (1000) 100 MS 105 outpatient dep.  Hellerstein 27 ( 130) 54 hospital  Kumawaza 46 ( 99) 104 hospital  Lachs 20 ( 366) 36 83 105 outpatient dep.  Madsen 27 ( 211) 76 77 mixed 105 hospital  Michie 39 ( 371) 78 67 mixed 105 hospital  Mills 14 ( 222) 65 0 MS, C 105 (single) hospital  Takagi 22 ( 52) 104 hospital  1993 Anderson 43 ( 160) C 105 outpatient dep.  Bachman 2 (1047) 28 100 MS 105 outpatient dep.  Dalton 29 ( 478) MS 104  - 105 outpatient dep.  de Torres 1 ( 540) 11 50 MS 105 (2) community  Etherington 3 ( 898) 100 MS 105 (single) outpatient dep.  Fabre 23 ( 853) 105 (2) outpatient dep.  Liptak 32 ( 329) (2wk-21yr) C 105 (3) hospital  Lohr 15 ( 689) (1mth-16yr) MS, C, SP 104 (MS),103(C),102(SP) outpatient dep.  Nauschuetz 18 ( 525) 71 105 hospital  Ortiz Ibarra 28 ( 60) 28 100 MS 105 (single) emergency dep.  Ortiz Ibarra 25 ( 20) 29 100 MS 105 (single) outpatient dep.  Woodward 12 ( 133) 8 53 MS, C, B 105 hospital  1994 Carroll 20 ( 142) (>17yrs) 66 MS 104 outpatient dep.  Fowlis 15 ( 200) MS 105 hospital  Fowlis 13 ( 200) MS 105 hospital  Gerber 336( 830) 100 SP any growth hospital  Hiraoka 24 ( 92) 5 46 MS, C, B 105(MS,B),103(C) hospital  Ordonez 18 ( 100) (1-24mths) 40 B 105 (single) outpatient dep.  Ravichandran 26 ( 38) 37 79 MS 105 emergency dep.  1995 Bailey 38 ( 202) 49 82 MS 54 family physician  Holland 7 (2928) (newborn-96yrs) 53 MS, C, B, SP 104 (single) hospital  Mimoz 37 ( 102) 49 36 C 103 hospital  Monane 17 ( 61) 77 100 MS 105 in- and outpatients  Nunns 7 ( 200) 100 C any (single) outpatient dep.  Reed 26 ( 134) 1 46 SP any (single) hospital  Sloos 68 ( 104) (18-65yrs) 100 MS 102 family physician  Winkens 65 (1388) (12-65yrs) 90 MS 105 family physician  1996 Hagay 5 ( 313) 27 100 MS 105 (single) outpatient dep.  Jellheden 50 ( 819) 47 100 MS 105 hospital  Leanos-Miranda 38 ( 105) 53 65 MS, C 103-105 emergency dep.  Osterberg 52 ( 217) 24 100 MS 103-105 (single) family physician  Timmermans 43 ( 195) (<12 - >65) 74 104 family physician  Zainal 1(44816) (7-12yrs) 48 MS 105 (single) community  1997 Edwards 22 ( 78) 41 105 (single) outpatient dep.  Garcia 17 ( 600) 5 44 MS, B, SP 105 (single) hospital  Hoberman 5 (5549) (1-24mths) C 54 (single) emergency dep.  Rivierre 19 ( 100) 85 65 105 hospital  Shaw 7 (1298) (2-19yrs) 60 MS, C 105 (MS),104 (C)(single) emergency dep.  1998 Christiaens 66 ( 249) 34 MS 105 family physician  Munyi 8 ( 186) 8 38 MS 102 hospital  Sharief 5 ( 325) 3 40 MS, B 105 (single) hospital  Shaw 3 (3394) 1 61 C 104 (single) hospital  Tincello 5 ( 893) 100 105 outpatient dep.  Zaman 17 ( 420) 56 56 MS 105 hospital  1999 Semeniuk 10 ( 479) 37 100 MS 105 (single) family ph./outpatient  Waisman 29 ( 121) (1mth-17yrs) 68 MS, C, B, SP 105(MS),103(C),102(SP) emergency dep. |

MS: midstream, C: catheterisation, B: bag, SP: suprapubic; cfu/ml: colony-forming units per ml of single (single) or more types of growth (2, 3). * 2 out of 70 publications report the evaluation in 2 separate populations.
